# Supplementary material for: Shall we add some meaning? Investigating useful single-item extensions to the short Warwick-Edinburgh Mental Well-Being Scale for national public health surveillance
Source: Research Square preprint supplement (doi:10.21203/rs.3.rs-6513849/v1), 2025-05-13
Supplement: Supplementary file 1 [file 3e297060e01bfe17730447a1.docx]

**Supplementary file**

**Shall we add some meaning? Investigating useful single-item extensions to the short Warwick-Edinburgh mental well-being scale for national public health surveillance.**

**S1**

*Item mean values and 95% confidence intervals across age, sex, and education groups (N = 2,614)*

| **Item** | **Content** | **Age** | | | |  | **Sex** | | |  | **Education1** | | |
| --- | --- | --- | --- | --- | --- | --- | --- | --- | --- | --- | --- | --- | --- |
| **18-29** | **30-44** | **45-59** | **60-74** |  | **Male** | **Female** | **Non-binary** |  | **Low** | **Moderate** | **High** | |
| wemwbs1 | Feeling optimistic about the future | 3.22 [3.13, 3.30] | 3.27  [3.19, 3.36] | 3.19 [3.11, 3.28] | 3.43 [3.35, 3.51] |  | 3.36 [3.30, 3.42] | 3.21 [3.15, 3.26] | 2.81  [2.26, 3.37] |  | 3.45 [3.39, 3.52] | 3.16  [3.09, 3.24] | 3.22 [3.15, 3.30] | |
| wemwbs2 | Feeling useful | 3.29 [3.21, 3.37] | 3.48 [3.40, 3.560] | 3.59 [3.51, 3.67] | 3.77 [3.70, 3.84] |  | 3.57 [3.51, 3.62] | 3.52 [3.46, 3.58] | 2.44 [1.92, 2.95] |  | 3.65 [3.59, 3.72] | 3.40  [3.33, 3.47] | 3.51 [3.48, 3.62] | |
| wemwbs3 | Feeling relaxed | 3.09 [3.01, 3.17] | 3.15 [3.06, 3.23] | 3.34 [3.26, 3.42] | 3.62 [3.55, 3.70] |  | 3.41 [3.36, 3.47] | 3.20 [3.14, 3.25] | 3.13 [2.58, 3.67] |  | 3.36 [3.29, 3.43] | 3.25 [3.17, 3.32] | 3.30 [3.23, 3.37] | |
| wemwbs6 | Dealing with problems well | 3.38 [3.31, 3.46] | 3.54 [3.47, 3.62] | 3.73 [3.66, 3.80] | 3.93 [3.87, 4.00] |  | 3.71 [3.65, 3.76] | 3.60 [3.55, 3.65] | 3.25 [2.72, 3.78] |  | 3.72 [3.66, 3.78] | 3.55 [3.48, 3.62] | 3.68 [3.62, 3.74] | |
| wemwbs7 | Thinking clearly | 3.54 [3.46, 3.61] | 3.77 [3.69, 3.84] | 4.04 [3.97, 4.11] | 4.33 [4.27, 4.39] |  | 3.92 [3.86, 3.97] | 3.93 [3.88, 3.99] | 3.44 [2.96, 3.91] |  | 4.06 [4.00, 4.11] | 3.78 [3.71, 3.85] | 3.93 [3.87, 4.00] | |
| wemwbs9 | Feeling close to other people | 3.36 [3.28, 3.44] | 3.42 [3.34, 3.51] | 3.44 [3.36, 3.53] | 3.63 [3.54, 3.80] |  | 3.44 [3.38, 3.50] | 3.50 [3.44, 3.55] | 2.69 [2.15, 3.23] |  | 3.63 [3.57, 3.69] | 3.30 [3.22, 3.37] | 3.47 [3.40, 3.54] | |
| wemwbs11 | Being able to make up one’s mind about things | 3.70 [3.63, 3.78] | 3.87 [3.80, 3.95] | 4.06 [3.99, 4.12] | 4.33 [7.27, 4.39] |  | 3.98 [3.93, 4.03] | 4.02 [3.97, 4.07] | 3.13 [2.58, 3.67] |  | 4.07 [4.01, 4.13] | 3.91 [3.84, 3.97] | 4.00 [3.94, 4.06] | |
| hap | Feeling happy | 4.79 [4.70, 4.91] | 4.92 [4.80, 5.04] | 4.95 [4.83, 5.06] | 5.23 [5.13, 5.33] |  | 5.03 [4.95, 5.11] | 4.93 [4.85, 5.01] | 4.25 [3.46, 5.04] |  | 5.24 [5.16, 5.33] | 4.74 [4.63, 4.84] | 4.94 [4.84, 5.04] | |
| swl | Being satisfied with life | 4.74  [4.62, 4.85] | 4.92 [4.80, 5.04] | 4.85 [4.73, 4.97] | 5.25 [5.15, 5.35] |  | 5.01 [4.92, 5.09] | 4.89 [4.81,  4.97] | 4.19 [3.15, 5.22] |  | 5.23 [5.14, 5.32] | 4.66 [4.56, 4.77] | 4.93 [4.83, 5.03] | |
| mol | Knowing one‘s life’s meaning | 4.51 [4.38 4.64] | 4.78 [4.65, 4.91] | 4.93 [4.81, 5.05] | 5.31 [5.20, 5.42] |  | 4.92 [4.84, 5.01] | 4.87 [4.78,  4.95] | 3.75 [2.77, 4.73] |  | 5.05 [4.95, 5.15] | 4.74 [4.62, 4.85] | 4.88  [4.77, 4.98] | |

*Note.* Item numbers and labels refer to the original WEMWBS scale (long form). Item scales of all SWEMWBS items ranged from 1 (“none of the time”) to 5 (“all of the time”), scales of all other items (hap, swl, mol) ranged from 1 (“strong disagreement”) to 7 (“strong agreement”).
1 The educational status was categorized as low = no qualification or 9 years of education (German Hauptschul- or Volksschulabschluss), moderate = 10 years of education (German Realschulabschluss, Fachschulreife, Mittlere Reife, or Polytechnische Oberschule), and high = 12 or 13 years of education (German Fachhochschulreife or allgemeine Hochschulreife/Abitur).

**S2**

*R syntax for analyses as presented in the manuscript*

# load packages

require(psych)

require(Hmisc)

require(lavaan)

require(lavaanPlot)

require(semTools)

require(GPArotation)

require(polycor)

require(splithalfr)

# read data

dat <- read.csv("data.csv", na.strings="NA",encoding="UTF8", sep=";")

# define relevant factor items

items <- c("wemwbs6", "wemwbs1", "wemwbs2", "wemwbs3", "wemwbs7", "wemwbs9", "wemwbs11", "hap", "swl", "mol")

dat <- dplyr::mutate(dat, across(dplyr::all_of(items), factor))

# ===========

# create results for section “Replication of the 7-item SWEMWBS Factorial Structure”

# ===========

### Confirmatory Factor Analysis (CFA) for the SWEMWBS one-factor solution

swemwbs <- 'f1 =~wemwbs1 + wemwbs2 + wemwbs3 + wemwbs6 + wemwbs7 + wemwbs9 + wemwbs11'

cfa_swemwbs <- lavaan::cfa(swemwbs, data=dat, estimator="WLSMV", ordered=T, std.lv=T)

summary(cfa_swemwbs, fit.measures=T)

### CFA for the SWEMWBS three-factor solution

swemwbs3 <- 'eudaimonic =~wemwbs6+wemwbs7+wemwbs11

interpersonal =~wemwbs2+wemwbs9

hedonic =~wemwbs3+wemwbs1

eudaimonic ~~ hedonic

eudaimonic ~~ interpersonal

interpersonal ~~ hedonic'

cfa_swemwbs3 <- lavaan::cfa(swemwbs3, data=dat, estimator='WLSMV', ordered=T, std.lv=T)

summary(cfa_swemwbs3, fit.measures=T)

### CFA for the SWEMWBS Bifactor-(S I – 1) Model (as suggested by Eid, 2017)

swemwbs4 <- ' WB =~ wemwbs6 + wemwbs1 + wemwbs2 + wemwbs3 + wemwbs7 + wemwbs9 + wemwbs11

eudaimonic =~ wemwbs11 + wemwbs7

hedonic =~ wemwbs1 + wemwbs3

interpersonal =~ wemwbs2 + wemwbs9

WB ~~ 0*eudaimonic

WB ~~ 0*hedonic

WB ~~ 0*interpersonal '

cfa_swemwbs4 <- lavaan::cfa(swemwbs4, data=dat, estimator='WLSMV', ordered=T, std.lv=T)

summary(cfa_swemwbs4 , fit.measures=T)

# ===========

# create results for section “Exploration of the Extended 10-item Mental Well-being Measure Factorial Structure”

# ===========

### set seed for reproducible results and random split-half samples

set.seed(200324)

splitdata <- splitSample(dat, path="object")

summary(splitdata[[1]])

summary(splitdata[[2]])

dat_half1 <- as.data.frame(splitdata[[1]])

dat_half2 <- as.data.frame(splitdata[[2]])

s_items <- c("wemwbs1_s ", "wemwbs2_s ", "wemwbs3_s ", "wemwbs6_s ", "wemwbs7_s", "wemwbs9_s","wemwbs11_s", "swl_s", "hap_s", "mol_s")

dat_half1 <- dplyr::mutate(dat_half1, across(dplyr::all_of(items), factor))

dat_half2 <- dplyr::mutate(dat_half2, across(dplyr::all_of(items), factor))

dat_half1 <- dplyr::mutate(dat_half1, across(dplyr::all_of(s_items), as.numeric))

dat_half2 <- dplyr::mutate(dat_half2, across(dplyr::all_of(s_items), as.numeric))

WB_dat_half2 <- dat_half2[, c("wemwbs1", "wemwbs2", "wemwbs3", "wemwbs6", "wemwbs7", "wemwbs9", "wemwbs11", "swl", "hap", "mol")]

WB_dat_half2B <- dat_half2[, c("wemwbs1_s", "wemwbs2_s", "wemwbs3_s", "wemwbs6_s", "wemwbs7_s", "wemwbs9_s", "wemwbs11_s", "swl_s", "hap_s", "mol_s")]

### Exploratory Factor Analyses (EFA) and subsequent model fit evaluations with one random split-half sample

# KMO

KMO(polychoric(WB_dat_half2)$rho)

KMO(WB_dat_half2B)

# Parallel Analysis

EFA_WB_half2 <- fa.parallel(WB_dat_half2,

fm = "pa", fa = "fa", cor = "poly",

main = "Parallel Analysis Scree Plot",

SMC = T)

EFA_WB_half2 <- fa.parallel(WB_dat_half2B,

fm = "pa", fa = "fa",

main = "Parallel Analysis Scree Plot",

SMC = T)

# EFA with four factors

WB_efa <- efa(data = WB_dat_half2, nfactors = 1:4, rotation="geomin", estimator='WLSMV', ordered=T)

summary(WB_efa)

# EFA with four factors while excluding the reference item wemwbs6

WB_efa1 <- efa(data = WB_dat_half2[,-4], nfactors = 1:4, rotation="geomin", estimator='WLSMV', ordered=T)

summary(WB_efa1)

### CFA for the SWEMWBS+SI one factor solution with the second random split-half sample

wb1 <- 'WB =~wemwbs1 + wemwbs2 + wemwbs3 + wemwbs6 + wemwbs7 + wemwbs9 + wemwbs11 + swl + hap + mol'

cfa_wb1<- lavaan::cfa(wb1, data=dat_half1, estimator='WLSMV', ordered=T, std.lv=T)

summary(cfa_wb1, fit.measures=T)

### CFA for the SWEMWBS+SI correlated four-factor solution with the second random split-half sample

wb4 <- ' eudaimonic =~ wemwbs6+wemwbs7+wemwbs11

hedonic =~ wemwbs1+wemwbs3

interpersonal =~ wemwbs2+wemwbs9

SI =~ hap+swl+mol '

cfa_wb4 <- lavaan::cfa(wb4, data=dat_half1, estimator='WLSMV', ordered=T, std.lv=T)

summary(cfa_wb4, fit.measures=T)

### CFA for the SWEMWBS+SI Bifactor-(S·I – 1) Model (Eid, 2017) solution with the second random split-half sample, including 4 correlated grouping factors and one uncorrelated general factor, using wemwbs6 as reference item

wb_bi4 <- ' WB =~ wemwbs6 + wemwbs1 + wemwbs2 + wemwbs3 + wemwbs7 + wemwbs9 + wemwbs11 + hap + swl + mol

eudaimonic =~ wemwbs11 + wemwbs7

hedonic =~ wemwbs1 + wemwbs3

interpersonal =~ wemwbs2 + wemwbs9

SI =~ hap + swl + mol

WB ~~ 0*eudaimonic

WB ~~ 0*hedonic

WB ~~ 0*interpersonal

WB ~~ 0*SI'

cfa_wb_bi4 <- lavaan::cfa(wb_bi4, data=dat_half1, estimator='WLSMV', ordered = T, std.lv=T)

summary(cfa_wb_bi4, fit.measures=T)

### model comparison of the correlated four-factorial and bi-factorial models

anova(cfa_wb4, cfa_wb_bi4)

### Reliability coefficients

# Cronbach’s alpha for the general factor and based on the sample

psych::alpha(polychoric(dat[items])$rho) # polychoric correlation

psych::alpha(dat[s_items]) # pearson correlation

# Cronbach’s alpha with polychoric ordinal correlation (ordered alpha)

SI <- dat[,c("swl","hap","mol")]

psych::alpha(polychoric(SI)$rho)

# Cronbach’s alpha with pearson correlation

SI_s <- dat[,c("swl_s","hap_s","mol_s")];

psych::alpha(SI_s)

# Sperman-Brown for two-item scales with polychoric ordinal correlation

spearman_brown(dat$wemwbs7,dat$wemwbs11, fn_cor=polychor)

spearman_brown(dat$wemwbs2,dat$wemwbs9, fn_cor=polychor)

spearman_brown(dat$wemwbs1,dat$wemwbs3, fn_cor=polychor)

# Spearman-Brown for two-item scales with standardized numeric items

spearman_brown(dat$wemwbs7_s,dat$wemwbs11_s)

spearman_brown(dat$wemwbs2_s,dat$wemwbs9_s)

spearman_brown(dat$wemwbs1_s,dat$wemwbs3_s)

# Omega from model results for random split-half samples

psych::omegaFromSem(cfa_wb_bi4)

psych::omegaFromSem(cfa_wb4)

# ===========

# create results for section “Evaluation of the Additional Value of the Three Mental Well-being Single Items”

# ===========

### Multiple regression analyses to estimate the explained variance of SWEMWBS for SI items

dat$swemwbs<-(fac_to_num(dat$wemwbs1) + fac_to_num(dat$wemwbs2) + fac_to_num(dat$wemwbs3) + fac_to_num(dat$wemwbs6) + fac_to_num(dat$wemwbs7) + fac_to_num(dat$wemwbs9) + fac_to_num(dat$wemwbs11))

summary(lm(hap_s ~ swemwbs, data = dat))

summary(lm(swl_s ~ swemwbs, data = dat))

summary(lm(mol_s ~ swemwbs, data = dat))

# Regressing swemwbs on the SI items to analyze the categorical nature of items

summary(lm(swemwbs ~ hap, data = dat))

summary(lm(swemwbs ~ swl, data = dat))

summary(lm(swemwbs ~ mol, data = dat))

### Consistency and specificity coefficients

# Note: For Consistency (CO) the factor loadings of the general factor are required, for method specificity (MS) the loading of the residual (2nd order) factor is required; Reliability (Rel) is indicated by R² when the item is regressed on the latent variable

bi4_sum <- summary(cfa_wb_bi4, standardized = T, fit.measures = T, rsquare = T)

Rel_hap <- bi4_sum$pe[bi4_sum$pe$lhs=="hap" & bi4_sum$pe$op=="r2", "est"]

Err_hap <- 1 - Rel_hap

CO_hap <- bi4_sum$pe[bi4_sum$pe$lhs=="WB" & bi4_sum$pe$op=="=~" & bi4_sum$pe$rhs=="hap" , "est"]^2

MS_hap <- bi4_sum$pe[bi4_sum$pe$lhs=="SI" & bi4_sum$pe$op=="=~" & bi4_sum$pe$rhs=="hap" , "est"]^2

CO_hap_true <- CO_hap / Rel_hap

MS_hap_true <- MS_hap / Rel_hap

# check: should result in 1

MS_hap + CO_hap + Err_hap

CO_hap_true + MS_hap_true

Rel_mean <- bi4_sum$pe[bi4_sum$pe$lhs=="mol" & bi4_sum$pe$op=="r2", "est"]

Err_mean <- 1 - Rel_mean

CO_mean <- bi4_sum$pe[bi4_sum$pe$lhs=="WB" & bi4_sum$pe$op=="=~" & bi4_sum$pe$rhs=="mol" , "est"]^2

MS_mean <- bi4_sum$pe[bi4_sum$pe$lhs=="SI" & bi4_sum$pe$op=="=~" & bi4_sum$pe$rhs=="mol" , "est"]^2

CO_mean_true <- CO_mean / Rel_mean

MS_mean_true <- MS_mean / Rel_mean

# check: should result in 1

MS_mean + CO_mean + Err_mean

CO_mean_true + MS_mean_true

Rel_swl <- bi4_sum$pe[bi4_sum$pe$lhs=="swl" & bi4_sum$pe$op=="r2", "est"]

Err_swl <- 1 - Rel_swl

CO_swl <- bi4_sum$pe[bi4_sum$pe$lhs=="WB" & bi4_sum$pe$op=="=~" & bi4_sum$pe$rhs=="swl" , "est"]^2

MS_swl <- bi4_sum$pe[bi4_sum$pe$lhs=="SI" & bi4_sum$pe$op=="=~" & bi4_sum$pe$rhs=="swl" , "est"]^2

CO_swl_true <- CO_swl / Rel_swl

MS_swl_true <- MS_swl / Rel_swl

# check: should result in 1

MS_swl + CO_swl + Err_swl

CO_swl_true + MS_swl_true
